# Supplementary material for: Carbon dot targeting to nitrogen signaling molecules for inhibiting neuronal death
Source: Royal Society of Chemistry journal article supplement (doi:10.1039/c9tb02447f), 2020-01-01
Supplement: c9tb02447f1.pdf [file c9tb02447f1.pdf]

## Supporting information

# Carbon Dot Targeting to Nitrogen Signaling Molecules for Inhibiting Neuronal Death

Lufei Ouyang,<sup>a</sup> Xiaoyu Mu,<sup>a</sup> Junying Wang,<sup>a</sup> Qifeng Li,<sup>c</sup> Yalong Gao,<sup>c</sup> Haile Liu,<sup>a</sup> Si Sun,<sup>a</sup> Qinjuan Ren,<sup>a</sup> Ruijuan Yan,<sup>a</sup> Jingya Wang,<sup>d</sup> Qiang Liu,<sup>d</sup> Yuanming Sun,<sup>d</sup> Changlong Liu,<sup>a</sup> Hua He,<sup>\*b</sup> Wei Long,<sup>\*d</sup> and Xiao-Dong Zhang<sup>\*a,e</sup>

<sup>a</sup> Tianjin Key Laboratory of Low Dimensional Materials Physics and Preparing Technology, School of Sciences, Tianjin University, Tianjin 300350, China

<sup>b</sup> State Key Laboratory of Heavy Oil Processing and Center for Bioengineering and Biotechnology, China University of Petroleum (East China), Qingdao 266580, China

<sup>c</sup> Department of Neurosurgery and Key Laboratory of Post-trauma Neuro-repair and Regeneration in Central Nervous System, Tianjin Medical University General Hospital, Tianjin 300052, China

<sup>d</sup> Tianjin Key Laboratory of Molecular Nuclear Medicine, Institute of Radiation Medicine, Chinese Academy of Medical Sciences and Peking Union Medical College, Number 238, Baidi Road, Tianjin 300192, China

<sup>e</sup> Tianjin International Joint Research Center for Neural Engineering, Academy of Medical Engineering and Translational Medicine, Tianjin University, Tianjin 300072, China

\*Correspondence should be addressed to X.D. Zhang ([xiaodongzhang@tju.edu.cn](mailto:xiaodongzhang@tju.edu.cn)), W. Long. ([longway@irm-cams.ac.cn](mailto:longway@irm-cams.ac.cn)) and H. He ([huahe@upc.edu.cn](mailto:huahe@upc.edu.cn)).

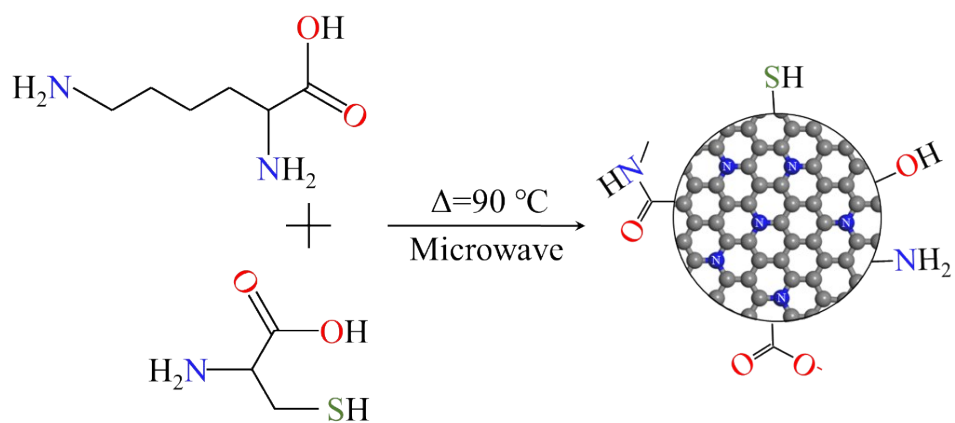

**Fig. S1** Schematic diagram of CD synthesis.

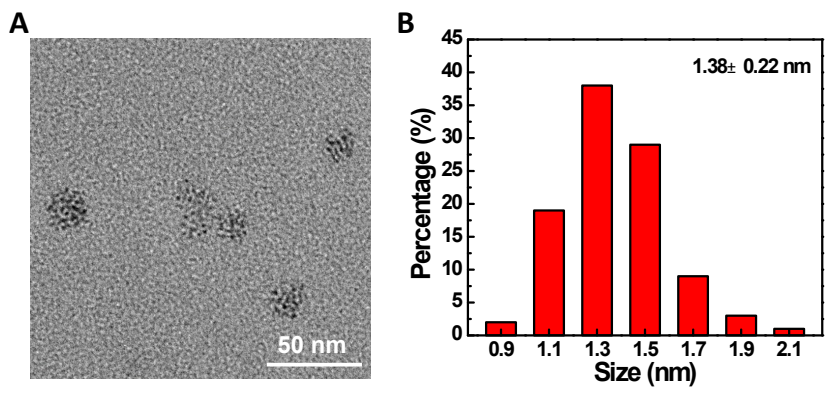

**Fig. S2 (A)** TEM image of CD. **(B)** Statistical analysis of the sizes of CD measured by TEM.

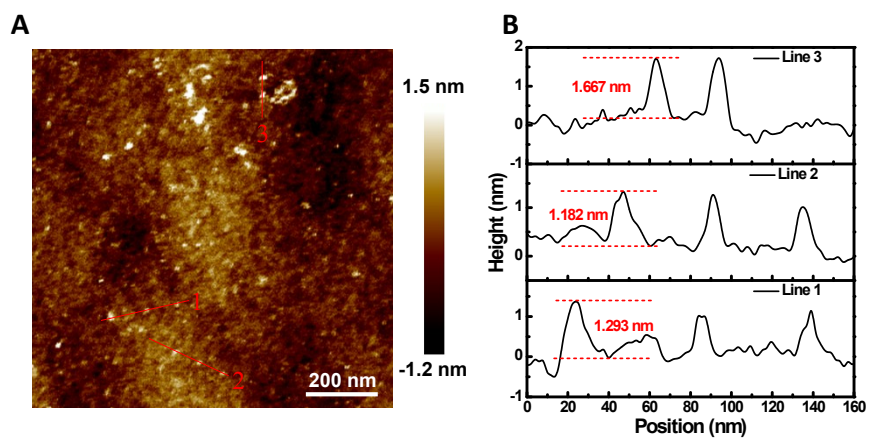

**Fig. S3 (A)** AFM image of CD. **(B)** Height profiles along the red lines in the Figure (A).

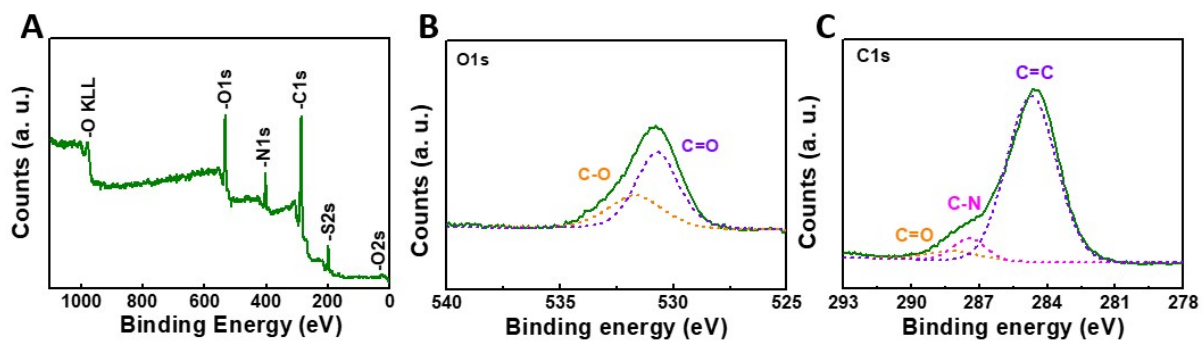

Fig. S4 (A) Whole, (B) and (C) fine XPS spectra of CD for O 1s and C 1s state, respectively.

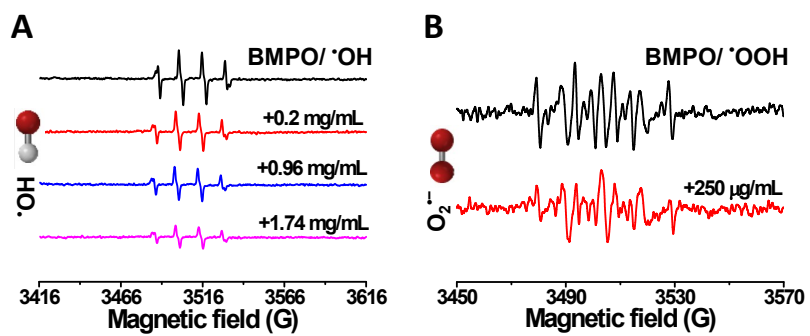

**Fig. S5 (A)  $\cdot\text{OH}$  and (B)  $\text{O}_2^{\cdot-}$  scavenging activities of CD, respectively.**

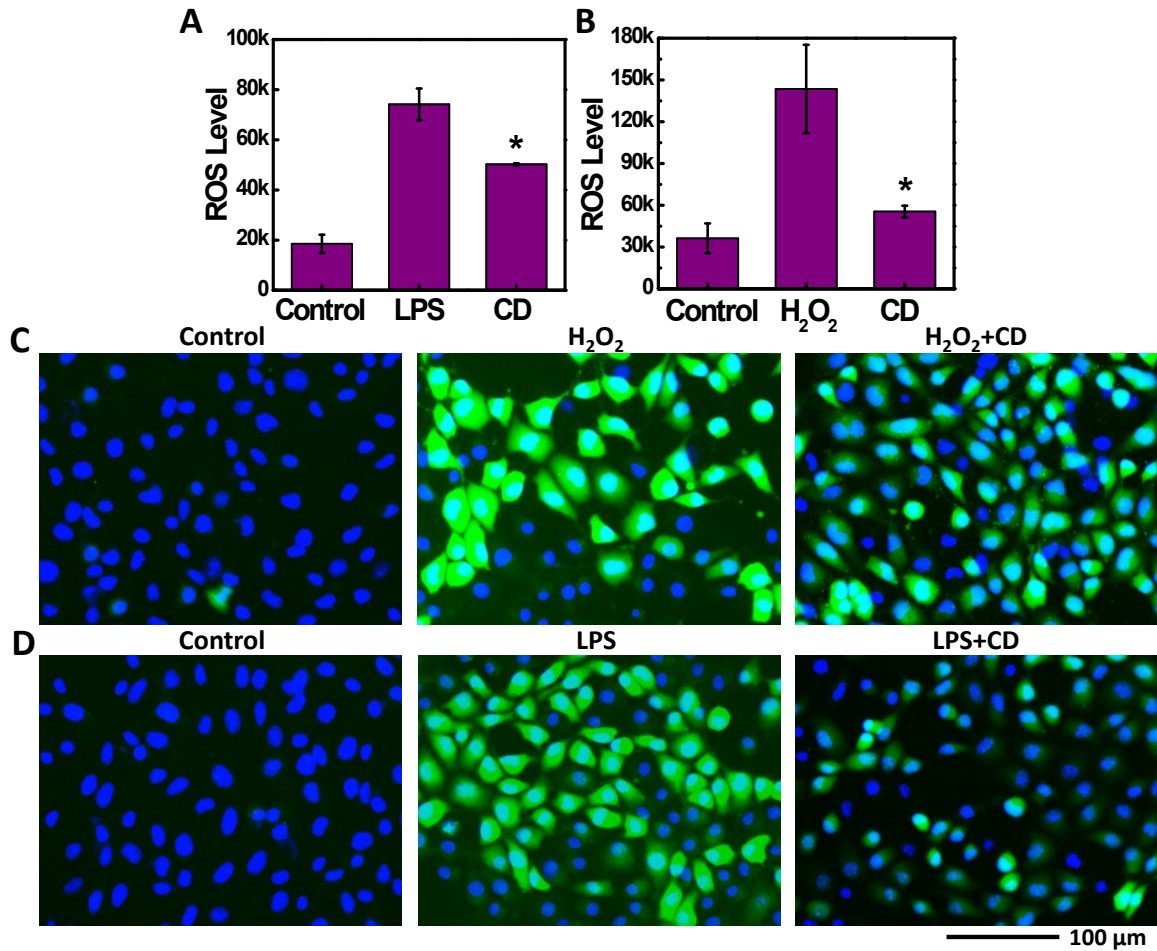

**Fig. S6 (A, B)** Intracellular ROS level after stimulation with H<sub>2</sub>O<sub>2</sub> and LPS for 24 hours using DCFH-DA probe, respectively. **(C, D)** Fluorescent microscopic images of intracellular ROS after H<sub>2</sub>O<sub>2</sub> and LPS stimulation for 24 hours using DCFH-DA probe. Blue: cell nuclei stained by Hoechst 33342. Green: fluorescent product of DCFH-DA being oxidized by ROS. (\*p<0.05 compared with H<sub>2</sub>O<sub>2</sub>- or LPS-treated group, one-way ANOVA)
